# Supplementary material
Source: Springer Nature journal article supplement (https://www.springermedizin.de/resource/supplementary/12889_2013_6814_MOESM3_ESM.pdf/9499042)
Supplement: MOESM3 [file 9499042]

**Table 2: Prevalence of total low-risk HPV, high-risk HPV and multiple HPV infections, among Nigerian women**

| <b>HPV Type</b>         | <b>Age ≤ 36 years<br/>N (%)</b> | <b>Age &gt; 36 years<br/>N (%)</b> | <b>P-value</b> |
|-------------------------|---------------------------------|------------------------------------|----------------|
| <b>Any HPV</b>          | 63 (47.4)                       | 38 (27.9)                          | 0.001          |
| <b>Any lrHPV</b>        | 43 (32.3)                       | 21 (15.4)                          | 0.001          |
| <b>Any hrHPV</b>        | 45 (33.1)                       | 22 (16.2)                          | <0.001         |
| <b>Any multiple HPV</b> | 36 (27.1)                       | 10 (7.5)                           | <0.001         |
| <b>Multiple lrHPV</b>   | 17 (12.8)                       | 4 (2.9)                            | 0.003          |
| <b>Multiple hrHPV</b>   | 17 (12.8)                       | 6 (4.4)                            | 0.01           |
